# Supplementary material for: Photochemical modification of diamond powders with elemental sulfur and their surface-attachment behavior on gold surfaces
Source: Royal Society of Chemistry journal article supplement (doi:10.1039/b814406k), 2008-11-14
Supplement: b814406k.pdf [file b814406k.pdf]

## Electronic supplementary information

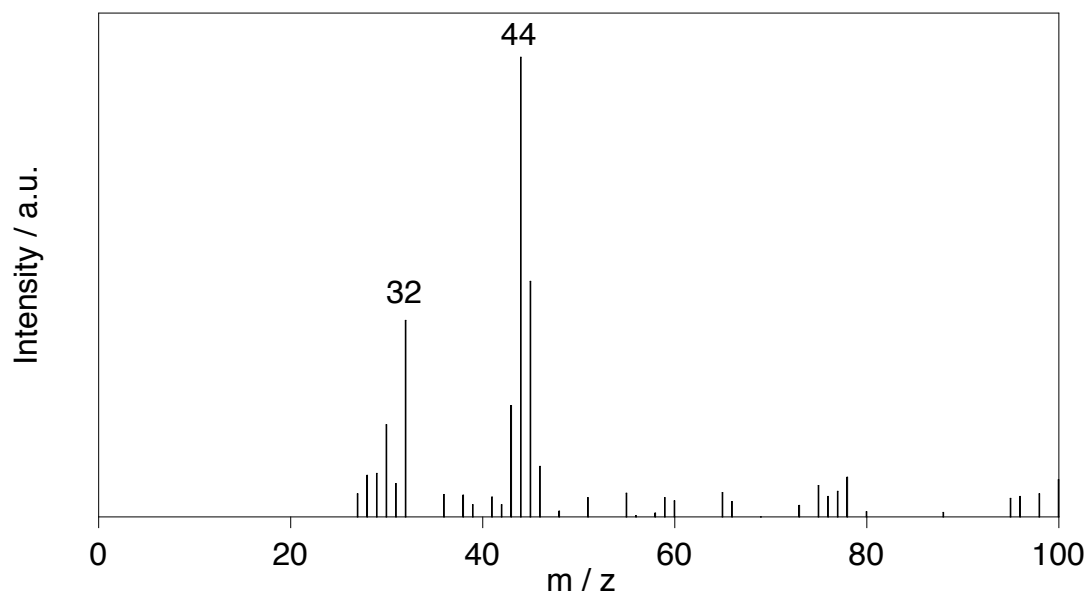

Fig. 1. Mass spectrum of sulfur-modified diamond powders after heating to 300 °C.

## Electronic supplementary information

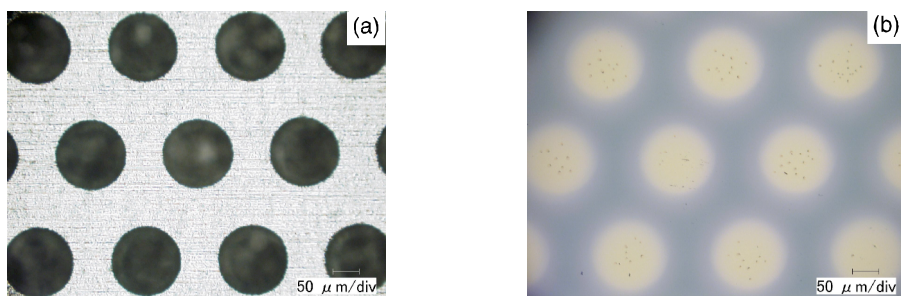

Fig. 2. Optical microscope images of (a) metal mask and (b) Au patterning.
